# Supplementary material for: Mild and rapid surface initiated ring-opening polymerisation of trimethylene carbonate from cellulose
Source: Royal Society of Chemistry journal article supplement (doi:10.1039/c4ra01788a), 2014-01-01
Supplement: c4ra01788a1.pdf [file c4ra01788a1.pdf]

## Supporting Information:

# Mild and Rapid Surface Initiated Ring-Opening Polymerisation of Trimethylene Carbonate from Cellulose

*Samuel A. Pendergraph, \* Gregor Klein, Mats K.G. Johansson, Anna Carlmark\**

KTH Royal Institute of Technology, School of Chemical Science and Engineering, Fibre and  
Polymer Technology, Teknikringen 56, SE-100 44, Stockholm, Sweden

\*Corresponding authors. *E-mail:* spender@kth.se, annac@kth.se

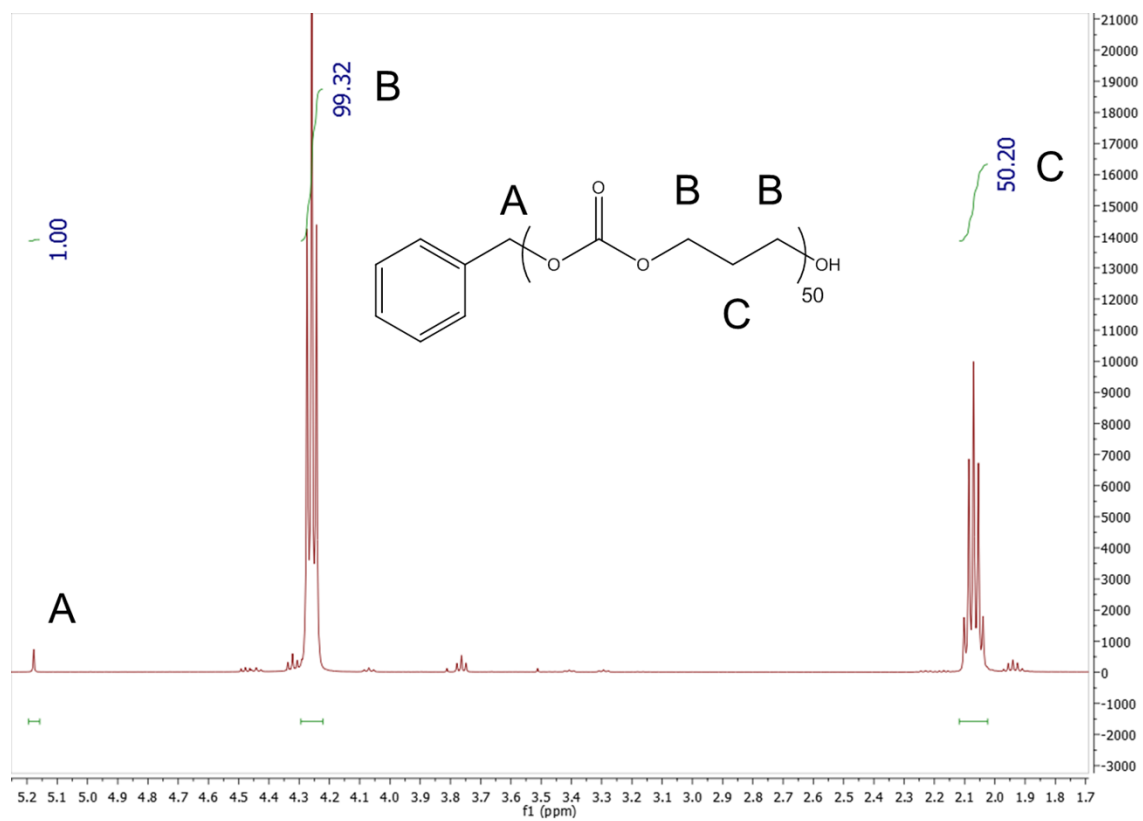

Figure S1. <sup>1</sup>H NMR of free TMC polymer (DP =50) extracted after precipitation.

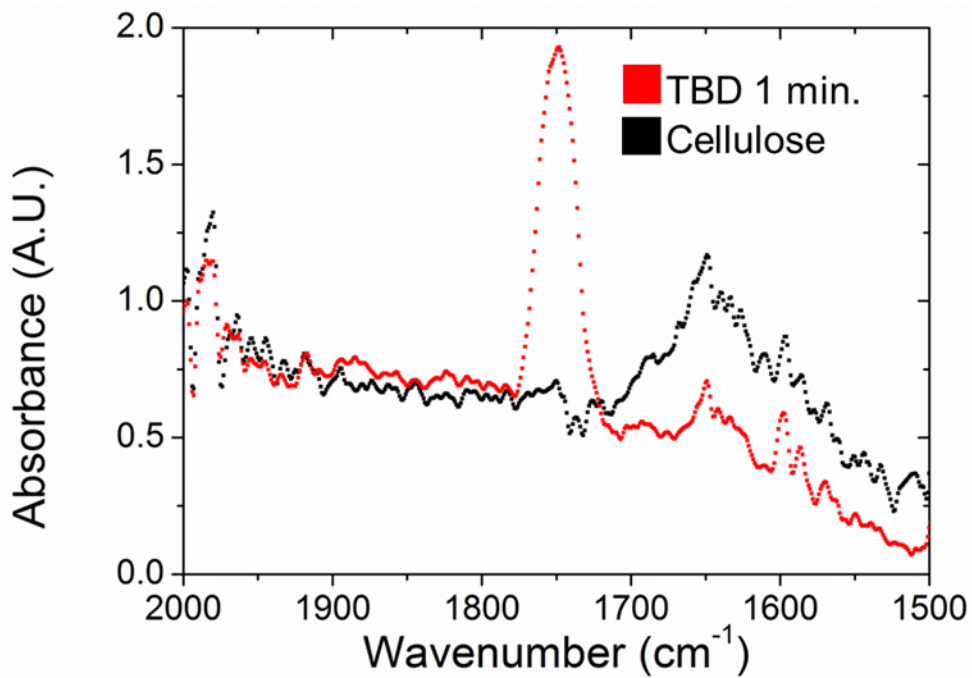

Figure S2. IR spectroscopy on unmodified cellulose (black) and paper grafted with PTMC for 1 minute with the TBD catalyst (DP =100).
